# Supplementary material
Source: PubMed Central journal article supplement (PMC5360278)
Supplement: DC161773SupplementaryData.pdf [file DC161773SupplementaryData.pdf]

SUPPLEMENTARY DATA

**Non-diabetic Glucometabolic Status and Progression of Aortic Stiffness:  
the Whitehall II study**

Carmel M. McEniery<sup>1</sup>  
Ian B. Wilkinson<sup>1</sup>  
Nanna B. Johansen<sup>2,6</sup>  
Daniel R. Witte<sup>3,6</sup>  
Archana Singh-Manoux<sup>4</sup>  
Mika Kivimaki<sup>4</sup>  
Adam G. Tabak<sup>4,5</sup>  
Eric J. Brunner<sup>4</sup>  
Martin J. Shipley<sup>4</sup>

<sup>1</sup> Division of Experimental Medicine and Immunotherapeutics, University of Cambridge, UK

<sup>2</sup> Steno Diabetes Center A/S, Gentofte, Denmark

<sup>3</sup> Department of Public Health, Aarhus University, Denmark

<sup>4</sup> UCL Research Department of Epidemiology and Public Health, London, UK

<sup>5</sup> Faculty of Medicine, 1st Department of Medicine, Semmelweis University, Budapest, Hungary

<sup>6</sup> Danish Diabetes Academy, Odense, Denmark

**Author for Correspondence**

Dr Carmel McEniery  
Division of Experimental Medicine and Immunotherapeutics  
Box 98 Addenbrooke's Hospital  
Cambridge  
CB2 0QQ  
UK

Tel 01223336806  
email [cmm41@cam.ac.uk](mailto:cmm41@cam.ac.uk)

## SUPPLEMENTARY DATA

### Materials

#### Supplementary statistical analyses

Distributions of glycaemic indices among non-diabetics were categorised in sex-specific quintiles and also expressed in standardised units. Linear mixed models were used to estimate the relation of the glycaemic indices with cfPWV in 2008-09 and change in cfPWV between 2008-09 and 2012-13. These models use all available cfPWV data, including where only one cfPWV measurement is available, which reduces selection bias and allows better estimates of the associations of potential confounding factors. The models also account for correlation between repeated measures within individuals. We fitted the intercept and slope with time as random effects for individual differences in cfPWV at baseline and rate of change over follow-up. From these models, the effect of each glycaemic index on cfPWV at baseline (2008-2009) is estimated by the coefficient for the main effect of the glycaemic index and the effect on progression of cfPWV between 2008-09 and 2012-13 is estimated by the interaction of the main effect with time. The longitudinal effects of the glycaemic indices have been expressed as 5-year changes in cfPWV to allow direct comparisons with other studies (refs). All estimates were initially adjusted for age, sex, ethnic group, heart rate and MAP at the time of cfPWV measurement. Baseline cfPWV and progression of cfPWV per 5 years were estimated from these models by quintile of each glycaemic index distribution and per 1SD increment in each index. This allowed us to examine associations with cfPWV across the distribution of each glycaemic index and whether the coefficients increased linearly across quintiles. Two further models cumulatively adjusted for: (i) systolic blood pressure, antihypertensive medication, lipid lowering medication, prevalent MI or stroke, smoking status and mean triglyceride and HDL-cholesterol between 2003-04 and 2008-09 and (ii) mean BMI between 2003-04 and 2008-09.

SUPPLEMENTARY DATA

**Supplementary Table S1. Characteristics of participants according to whether cfPWV was assessed**

| Time of assessment    | Characteristic               | cfPWV measured |      | cfPWV not measured |      |  |
|-----------------------|------------------------------|----------------|------|--------------------|------|--|
|                       |                              | Mean (SD)      | %    | Mean (SD)          | %    |  |
| Baseline (2008-2009)  | Number of participants       | 4347           |      | 1878               |      |  |
|                       | Age, y                       | 65.3 (5.7)     |      | 66.0 (5.9)         |      |  |
|                       | Female                       | 25.5           |      | 35.7               |      |  |
|                       | Ethnic group:                | White          | 92.2 |                    | 92.1 |  |
|                       |                              | South Asian    | 4.5  |                    | 4.9  |  |
|                       |                              | Black          | 2.5  |                    | 2.6  |  |
|                       |                              | Other          | 0.8  |                    | 0.5  |  |
|                       | Diabetes                     | 14.3           |      | 19.7               |      |  |
|                       | MI or stroke                 | 5.3            |      | 8.9                |      |  |
|                       | Anti-hypertensive medication | 32.8           |      | 45.2               |      |  |
|                       | Lipid lowering medication    | 30.7           |      | 39.8               |      |  |
|                       | Ex-smoker                    | 46.1           |      | 47.3               |      |  |
| Current smoker        | 4.9                          |                | 7.0  |                    |      |  |
| Follow-up (2012-2013) | Number of participants       | 4485           |      | 1175               |      |  |
|                       | Age, y                       | 69.2 (5.7)     |      | 71.0 (6.1)         |      |  |
|                       | Female                       | 26.1           |      | 35.9               |      |  |
|                       | Ethnic group:                | White          | 92.6 |                    | 92.5 |  |
|                       |                              | South Asian    | 4.2  |                    | 4.4  |  |
|                       |                              | Black          | 2.4  |                    | 2.3  |  |
|                       |                              | Other          | 0.7  |                    | 0.9  |  |
|                       | Diabetes                     | 12.9           |      | 21.5               |      |  |
|                       | MI or stroke                 | 5.3            |      | 8.9                |      |  |
|                       | Anti-hypertensive medication | 40.2           |      | 54.9               |      |  |

## SUPPLEMENTARY DATA

|                           |      |      |
|---------------------------|------|------|
| Lipid lowering medication | 40.5 | 45.4 |
| Ex-smoker                 | 49.9 | 52.0 |
| Current smoker            | 3.2  | 4.2  |

---

SUPPLEMENTARY DATA

**Supplementary Table S2. Descriptive statistics of characteristics that were averaged across pre-baseline (2003-2004) and baseline (2008-2009) phases in the analysis and inflammatory markers measured at pre-baseline, among the 4386 participants who contributed to the analyses**

| Characteristic                     | Average of (2003-2004) and (2008-2009) | Pre-baseline (2003-2004) | Baseline (2008-2009) |
|------------------------------------|----------------------------------------|--------------------------|----------------------|
|                                    | Mean (SD)                              | Mean (SD)                | Mean (SD)            |
| Body mass index, kg/m <sup>2</sup> | 26.2 (3.9)                             | 26.1 (3.9)               | 26.2 (4.0)           |
| HDL cholesterol, mmol/L            | 1.62 (0.43)                            | 1.60 (0.44)              | 1.63 (0.45)          |
| Triglyceride, mmol/L               | 1.23 (0.66)                            | 1.29 (0.79)              | 1.17 (0.65)          |
| IL6, ng/ml                         | -                                      | 1.77*(0.57)              | -                    |
| CRP, mg/L                          | -                                      | 1.17* (1.08)             | -                    |
| Fasting glucose, mmol/L            | 5.13* (0.08)                           | 5.19* (0.09)             | 5.07* (0.10)         |
| 2-hour glucose, mmol/L             | 6.14* (0.22)                           | 5.94* (0.25)             | 6.23* (0.26)         |
| HbA1c, %                           | 5.39* (0.06)                           | 5.16* (0.07)             | 5.58* (0.07)         |
| HbA1c, mmol/mol                    | 35.4* (0.06)                           | 32.9* (0.07)             | 37.5* (0.07)         |
| HOMA-IR                            | 1.53* (0.62)                           | 1.57* (0.65)             | 1.40* (0.68)         |

\* Geometric mean and SD of logged values

SUPPLEMENTARY DATA

**Supplementary Table S3. The associations of glucometabolic indices with cfPWV in men and women**

| Glucometabolic measure <sup>a</sup> | Sex                    | cfPWV at baseline                |         | Change in cfPWV (per 5 years)  |         |
|-------------------------------------|------------------------|----------------------------------|---------|--------------------------------|---------|
|                                     |                        | Difference <sup>b</sup> (95% CI) | P-value | Increase <sup>b</sup> (95% CI) | P-value |
| Fasting glucose                     | Men                    | 0.07 (0.01, 0.13)                | 0.03    | 0.03 (-0.06, 0.11)             | 0.56    |
|                                     | Women                  | 0.13 (0.02, 0.25)                | 0.03    | -0.08 (-0.23, 0.07)            | 0.28    |
|                                     | P-value for difference | 0.50                             |         | 0.29                           |         |
| 2-hour glucose                      | Men                    | 0.09 (0.03, 0.15)                | 0.006   | 0.08 (-0.01, 0.17)             | 0.08    |
|                                     | Women                  | 0.17 (0.06, 0.27)                | 0.002   | 0.05 (-0.09, 0.18)             | 0.52    |
|                                     | P-value for difference | 0.29                             |         | 0.80                           |         |
| HbA1c                               | Men                    | 0.03 (-0.03, 0.10)               | 0.29    | 0.12 (0.04, 0.21)              | 0.006   |
|                                     | Women                  | 0.11 (0.00, 0.22)                | 0.04    | 0.10 (-0.04, 0.23)             | 0.17    |
|                                     | P-value for difference | 0.24                             |         | 0.81                           |         |
| HOMA-IR                             | Men                    | 0.13 (0.07, 0.19)                | <0.001  | 0.12 (0.03, 0.21)              | 0.009   |
|                                     | Women                  | 0.22 (0.11, 0.33)                | <0.001  | 0.08 (-0.06, 0.22)             | 0.02    |
|                                     | P-value for difference | 0.29                             |         | 0.84                           |         |

<sup>a</sup> Values are the averages of measurements made at 2003-04 and 2008-09.

<sup>b</sup> Differences and increases in cfPWV are per 1SD change in glucometabolic measure and are adjusted for age, ethnic group, heart rate and mean arterial pressure at the time of the cfPWV measurement

SUPPLEMENTARY DATA

**Supplementary Table S4. The associations of glucometabolic indices with cfPWV at baseline (2008-2009)**

| Glucometabolic measure <sup>a</sup> | Model 1 <sup>b</sup>   |         | Model 2 <sup>c</sup>   |         | Model 3 <sup>d</sup>   |         |
|-------------------------------------|------------------------|---------|------------------------|---------|------------------------|---------|
|                                     | Difference<br>(95% CI) | P-value | Difference<br>(95% CI) | P-value | Difference<br>(95% CI) | P-value |
| <u>Fasting glucose</u>              |                        |         |                        |         |                        |         |
| Q1 - lowest quintile                | Ref                    | -       | Ref                    | -       | Ref                    | -       |
| Q2                                  | 0.04 (-0.13, 0.21)     | 0.64    | 0.04 (-0.12, 0.20)     | 0.62    | 0.04 (-0.13, 0.20)     | 0.64    |
| Q3                                  | 0.11 (-0.05, 0.27)     | 0.18    | 0.08 (-0.08, 0.23)     | 0.33    | 0.07 (-0.08, 0.23)     | 0.37    |
| Q4                                  | 0.22 (0.06, 0.37)      | 0.007   | 0.17 (0.02, 0.33)      | 0.03    | 0.17 (0.01, 0.32)      | 0.03    |
| Q5 - highest quintile               | 0.27 (0.11, 0.43)      | 0.001   | 0.18 (0.02, 0.34)      | 0.003   | 0.18 (0.02, 0.34)      | 0.03    |
| Heterogeneity (P-value)             | 0.005                  |         | 0.10                   |         | 0.12                   |         |
| <u>2-hour glucose</u>               |                        |         |                        |         |                        |         |
| Q1 - lowest quintile                | Ref                    | -       | Ref                    | -       | Ref                    | -       |
| Q2                                  | 0.11 (-0.05, 0.27)     | 0.18    | 0.07 (-0.09, 0.23)     | 0.38    | 0.07 (-0.09, 0.23)     | 0.40    |
| Q3                                  | 0.17 (0.00, 0.33)      | 0.05    | 0.09 (-0.07, 0.25)     | 0.29    | 0.08 (-0.08, 0.25)     | 0.31    |
| Q4                                  | 0.10 (-0.06, 0.26)     | 0.22    | 0.00 (-0.16, 0.17)     | 0.96    | 0.00 (-0.17, 0.16)     | 0.97    |
| Q5 - highest quintile               | 0.32 (0.15, 0.48)      | <0.001  | 0.17 (0.00, 0.34)      | 0.04    | 0.17 (0.00, 0.34)      | 0.05    |
| Heterogeneity (P-value)             | 0.006                  |         | 0.34                   |         | 0.44                   |         |
| <u>HbA1c</u>                        |                        |         |                        |         |                        |         |
| Q1 - lowest quintile                | Ref                    | -       | Ref                    | -       | Ref                    | -       |
| Q2                                  | -0.08 (-0.25, 0.09)    | 0.33    | -0.08 (-0.25, 0.08)    | 0.33    | -0.09 (-0.25, 0.08)    | 0.31    |
| Q3                                  | 0.04 (-0.11, 0.19)     | 0.60    | 0.04 (-0.11, 0.18)     | 0.64    | 0.03 (-0.11, 0.18)     | 0.65    |
| Q4                                  | 0.21 (0.04, 0.37)      | 0.01    | 0.17 (0.01, 0.33)      | 0.04    | 0.17 (0.01, 0.33)      | 0.04    |
| Q5 - highest quintile               | 0.19 (0.02, 0.36)      | 0.03    | 0.14 (-0.02, 0.31)     | 0.09    | 0.14 (-0.03, 0.31)     | 0.11    |
| Heterogeneity (P-value)             | 0.003                  |         | 0.02                   |         | 0.02                   |         |
| <u>HOMA insulin resistance</u>      |                        |         |                        |         |                        |         |

## SUPPLEMENTARY DATA

|                         | Ref                | -      | Ref                 | -    | Ref                 | -    |
|-------------------------|--------------------|--------|---------------------|------|---------------------|------|
| Q1 - lowest quintile    |                    |        |                     |      |                     |      |
| Q2                      | 0.03 (-0.12, 0.19) | 0.67   | -0.02 (-0.18, 0.13) | 0.76 | -0.03 (-0.19, 0.13) | 0.74 |
| Q3                      | 0.26 (0.10, 0.41)  | 0.002  | 0.13 (-0.03, 0.30)  | 0.10 | 0.13 (-0.03, 0.30)  | 0.12 |
| Q4                      | 0.35 (0.19, 0.51)  | <0.001 | 0.17 (0.00, 0.34)   | 0.05 | 0.17 (-0.01, 0.34)  | 0.07 |
| Q5 - highest quintile   | 0.40 (0.23, 0.57)  | <0.001 | 0.17 (-0.01, 0.36)  | 0.07 | 0.17 (-0.04, 0.37)  | 0.11 |
| Heterogeneity (P-value) | <0.001             |        | 0.07                |      | 0.11                |      |

<sup>a</sup> Values are the averages of measurements made at 2003-04 and 2008-09.

<sup>b</sup> Model 1 is adjusted for age, sex, ethnic group, heart rate and mean arterial pressure at the time of the cfPWV measurement

<sup>c</sup> Model 2 is adjusted as for Model 1 + systolic blood pressure, antihypertensive medication, lipid lowering medication, prevalent MI or stroke, smoking status and mean triglyceride and HDL-cholesterol between 2003-04 and 2008-09

<sup>d</sup> Model 3 is adjusted as for Model 2 + mean BMI between 2003-04 and 2008-09



SUPPLEMENTARY DATA

**Supplementary Table S5. The associations of glucometabolic indices with progression of cfPWV per 5 years**

| Glucometabolic measure <sup>a</sup> | Model 1 <sup>b</sup> |         | Model 2 <sup>c</sup> |         | Model 3 <sup>d</sup> |         |
|-------------------------------------|----------------------|---------|----------------------|---------|----------------------|---------|
|                                     | Difference (95% CI)  | P-value | Difference (95% CI)  | P-value | Difference (95% CI)  | P-value |
| <u>Fasting glucose</u>              |                      |         |                      |         |                      |         |
| Q1 - lowest quintile                | Ref                  | -       | Ref                  | -       | Ref                  | -       |
| Q2                                  | 0.02 (-0.21, 0.25)   | 0.89    | -0.01 (-0.23, 0.22)  | 0.95    | -0.03 (-0.25, 0.20)  | 0.81    |
| Q3                                  | 0.01 (-0.20, 0.23)   | 0.91    | 0.01 (-0.21, 0.22)   | 0.96    | -0.02 (-0.23, 0.19)  | 0.84    |
| Q4                                  | 0.00 (-0.21, 0.22)   | 0.99    | -0.01 (-0.23, 0.20)  | 0.89    | -0.07 (-0.28, 0.15)  | 0.55    |
| Q5 - highest quintile               | 0.02 (-0.20, 0.24)   | 0.87    | -0.02 (-0.24, 0.20)  | 0.93    | -0.08 (-0.30, 0.14)  | 0.46    |
| Heterogeneity (P-value)             | 1.0                  |         | 1.0                  |         | 0.95                 |         |
| <u>2-hour glucose</u>               |                      |         |                      |         |                      |         |
| Q1 - lowest quintile                | Ref                  | -       | Ref                  | -       | Ref                  | -       |
| Q2                                  | 0.00 (-0.22, 0.21)   | 0.97    | -0.03 (-0.25, 0.18)  | 0.77    | -0.05 (-0.26, 0.17)  | 0.67    |
| Q3                                  | -0.01 (-0.24, 0.21)  | 0.90    | -0.07 (-0.28, 0.15)  | 0.56    | -0.08 (-0.30, 0.13)  | 0.45    |
| Q4                                  | 0.03 (-0.19, 0.26)   | 0.76    | 0.03 (-0.19, 0.25)   | 0.78    | -0.02 (-0.24, 0.21)  | 0.89    |
| Q5 - highest quintile               | 0.20 (-0.03, 0.43)   | 0.09    | 0.16 (-0.07, 0.39)   | 0.16    | 0.13 (-0.10, 0.36)   | 0.27    |
| Heterogeneity (P-value)             | 0.36                 |         | 0.23                 |         | 0.23                 |         |
| <u>HbA1c</u>                        |                      |         |                      |         |                      |         |
| Q1 - lowest quintile                | Ref                  | -       | Ref                  | -       | Ref                  | -       |
| Q2                                  | 0.14 (-0.09, 0.37)   | 0.24    | 0.13 (-0.10, 0.36)   | 0.27    | 0.12 (-0.10, 0.35)   | 0.29    |
| Q3                                  | 0.05 (-0.15, 0.26)   | 0.62    | 0.06 (-0.14, 0.26)   | 0.58    | 0.06 (-0.14, 0.26)   | 0.58    |
| Q4                                  | 0.11 (-0.11, 0.33)   | 0.34    | 0.10 (-0.12, 0.32)   | 0.39    | 0.09 (-0.13, 0.31)   | 0.44    |
| Q5 - highest quintile               | 0.39 (0.15, 0.62)    | 0.001   | 0.37 (0.14, 0.60)    | 0.001   | 0.33 (0.11, 0.56)    | 0.004   |
| Heterogeneity (P-value)             | 0.01                 |         | 0.02                 |         | 0.05                 |         |
| <u>HOMA insulin resistance</u>      |                      |         |                      |         |                      |         |
| Q1 - lowest quintile                | Ref                  | -       | Ref                  | -       | Ref                  | -       |
| Q2                                  | 0.06 (-0.16, 0.27)   | 0.61    | 0.03 (-0.18, 0.24)   | 0.76    | -0.02 (-0.23, 0.20)  | 0.87    |
| Q3                                  | 0.19 (-0.03, 0.40)   | 0.09    | 0.14 (-0.08, 0.36)   | 0.21    | 0.06 (-0.17, 0.28)   | 0.62    |

## SUPPLEMENTARY DATA

|                         |                    |       |                    |       |                    |      |
|-------------------------|--------------------|-------|--------------------|-------|--------------------|------|
| Q4                      | 0.20 (-0.02, 0.42) | 0.07  | 0.17 (-0.06, 0.39) | 0.15  | 0.05 (-0.19, 0.29) | 0.68 |
| Q5 - highest quintile   | 0.39 (0.15, 0.62)  | 0.001 | 0.34 (0.09, 0.59)  | 0.007 | 0.16 (-0.12, 0.43) | 0.26 |
| Heterogeneity (P-value) | 0.01               |       | 0.07               |       | 0.74               |      |

<sup>a</sup> Values are the averages of measurements made at 2003-04 and 2008-09.

<sup>b</sup> Model 1 is adjusted for age, sex, ethnic group, heart rate and mean arterial pressure at the time of the cfPWV measurement

<sup>c</sup> Model 2 is adjusted as for Model 1 + systolic blood pressure, antihypertensive medication, lipid lowering medication, prevalent MI or stroke, smoking status and mean triglyceride and HDL-cholesterol between 2003-04 and 2008-09

<sup>d</sup> Model 3 is adjusted as for Model 2 + mean BMI between 2003-04 and 2008-09

SUPPLEMENTARY DATA

**Supplementary Table S6. The associations of glucometabolic indices measured in 2008-09 with cfPWV and progression of cfPWV**

| Glucometabolic measure <sup>a</sup> | Model adjustments    | cfPWV at baseline                |         | Change in cfPWV (per 5 years)  |         |
|-------------------------------------|----------------------|----------------------------------|---------|--------------------------------|---------|
|                                     |                      | Difference <sup>b</sup> (95% CI) | P-value | Increase <sup>b</sup> (95% CI) | P-value |
| Fasting glucose                     | Model 1 <sup>c</sup> | 0.08 (0.03, 0.14)                | 0.002   | -0.01 (-0.08, 0.06)            | 0.76    |
|                                     | Model 2 <sup>d</sup> | 0.06 (0.00, 0.11)                | 0.03    | -0.02 (-0.09, 0.05)            | 0.55    |
|                                     | Model 3 <sup>e</sup> | 0.05 (0.00, 0.11)                | 0.04    | -0.04 (-0.11, 0.03)            | 0.29    |
| 2-hour glucose                      | Model 1 <sup>c</sup> | 0.07 (0.02, 0.13)                | 0.01    | 0.08 (0.01, 0.15)              | 0.03    |
|                                     | Model 2 <sup>d</sup> | 0.02 (-0.03, 0.08)               | 0.47    | 0.06 (-0.01, 0.14)             | 0.09    |
|                                     | Model 3 <sup>e</sup> | 0.02 (-0.04, 0.07)               | 0.51    | 0.05 (-0.02, 0.13)             | 0.17    |
| HbA1c                               | Model 1 <sup>c</sup> | 0.05 (-0.01, 0.10)               | 0.08    | 0.09 (0.02, 0.16)              | 0.01    |
|                                     | Model 2 <sup>d</sup> | 0.03 (-0.02, 0.08)               | 0.29    | 0.09 (0.01, 0.16)              | 0.02    |
|                                     | Model 3 <sup>e</sup> | 0.03 (-0.03, 0.08)               | 0.34    | 0.07 (0.00, 0.15)              | 0.04    |
| HOMA-IR                             | Model 1 <sup>c</sup> | 0.17 (0.11, 0.22)                | <0.001  | 0.11 (0.03, 0.18)              | 0.005   |
|                                     | Model 2 <sup>d</sup> | 0.09 (0.02, 0.15)                | 0.006   | 0.10 (0.02, 0.18)              | 0.02    |
|                                     | Model 3 <sup>e</sup> | 0.09 (0.02, 0.15)                | 0.01    | 0.03 (-0.06, 0.12)             | 0.47    |

<sup>a</sup> Values are measurements made at 2008-09.

<sup>b</sup> Differences and increases in cfPWV are per 1SD higher value for each glucometabolic measure

<sup>c</sup> Model 1 is adjusted for age, sex, ethnic group, heart rate and mean arterial pressure at the time of the cfPWV measurement

<sup>d</sup> Model 2 is adjusted as for Model 1 + systolic blood pressure, antihypertensive medication, lipid lowering medication, prevalent MI or stroke, smoking status and triglyceride and HDL-cholesterol values at 2008-09

<sup>e</sup> Model 3 is adjusted as for Model 2 + BMI at 2008-09

SUPPLEMENTARY DATA

**Supplementary Table S7. The associations of glucometabolic indices measured in 2003-04 with cfPWV and progression of cfPWV**

| Glucometabolic measure <sup>a</sup> | Model adjustments    | cfPWV at baseline                |         | Change in cfPWV (per 5 years)  |         |
|-------------------------------------|----------------------|----------------------------------|---------|--------------------------------|---------|
|                                     |                      | Difference <sup>b</sup> (95% CI) | P-value | Increase <sup>b</sup> (95% CI) | P-value |
| Fasting glucose                     | Model 1 <sup>c</sup> | 0.07 (0.01, 0.12)                | 0.02    | 0.03 (-0.04, 0.10)             | 0.40    |
|                                     | Model 2 <sup>d</sup> | 0.04 (-0.01, 0.09)               | 0.15    | 0.03 (-0.04, 0.10)             | 0.42    |
|                                     | Model 3 <sup>e</sup> | 0.04 (-0.02, 0.09)               | 0.20    | 0.01 (-0.07, 0.08)             | 0.86    |
| 2-hour glucose                      | Model 1 <sup>c</sup> | 0.12 (0.06, 0.18)                | <0.001  | 0.02 (-0.06, 0.09)             | 0.70    |
|                                     | Model 2 <sup>d</sup> | 0.08 (0.02, 0.14)                | 0.007   | 0.01 (-0.07, 0.08)             | 0.86    |
|                                     | Model 3 <sup>e</sup> | 0.08 (0.02, 0.14)                | 0.008   | -0.01 (-0.08, 0.07)            | 0.88    |
| HbA1c                               | Model 1 <sup>c</sup> | 0.09 (0.03, 0.15)                | 0.002   | 0.06 (-0.02, 0.13)             | 0.13    |
|                                     | Model 2 <sup>d</sup> | 0.07 (0.02, 0.13)                | 0.01    | 0.06 (-0.02, 0.13)             | 0.14    |
|                                     | Model 3 <sup>e</sup> | 0.07 (0.01, 0.12)                | 0.02    | 0.04 (-0.03, 0.12)             | 0.24    |
| HOMA-IR                             | Model 1 <sup>c</sup> | 0.13 (0.07, 0.18)                | <0.001  | 0.10 (0.03, 0.18)              | 0.007   |
|                                     | Model 2 <sup>d</sup> | 0.06 (0.00, 0.12)                | 0.06    | 0.09 (0.01, 0.17)              | 0.02    |
|                                     | Model 3 <sup>e</sup> | 0.05 (-0.02, 0.11)               | 0.15    | 0.03 (-0.05, 0.12)             | 0.42    |

<sup>a</sup> Values are measurements made at 2003-04.

<sup>b</sup> Differences and increases in cfPWV are per 1SD higher value for each glucometabolic measure

<sup>c</sup> Model 1 is adjusted for age, sex, ethnic group, heart rate and mean arterial pressure at the time of the cfPWV measurement

<sup>d</sup> Model 2 is adjusted as for Model 1 + systolic blood pressure, antihypertensive medication, lipid lowering medication, prevalent MI or stroke, smoking status and triglyceride and HDL-cholesterol values at 2008-09

<sup>e</sup> Model 3 is adjusted as for Model 2 + BMI at 2008-09

SUPPLEMENTARY DATA

**Supplementary Table S8. Comparison of the association between hypertension and HbA1c in those with and without cfPWV assessment.**

| Time of assessment    | cfPWV status | Hypertensive status <sup>a</sup>                       |                                                    | % Difference <sup>c</sup> in HbA1c (95%CI) |
|-----------------------|--------------|--------------------------------------------------------|----------------------------------------------------|--------------------------------------------|
|                       |              | Non-hypertensive<br>Mean <sup>b</sup> HbA1c<br>(95%CI) | Hypertensive<br>Mean <sup>b</sup> HbA1c<br>(95%CI) |                                            |
| Baseline (2008-2009)  |              |                                                        |                                                    |                                            |
|                       | Measured     | 5.62 (5.60, 5.64)                                      | 5.76 (5.74, 5.79)                                  | 2.4 (1.9, 3.0)                             |
|                       | Not measured | 5.74 (5.70, 5.79)                                      | 5.95 (5.91, 5.99)                                  | 3.6 (2.5, 4.7)                             |
| Follow-up (2012-2013) |              |                                                        |                                                    |                                            |
|                       | Measured     | 5.70 (5.68, 5.72)                                      | 5.87 (5.84, 5.89)                                  | 2.9 (2.3, 3.5)                             |
|                       | Not measured | 5.82 (5.75, 5.89)                                      | 6.01 (5.96, 6.06)                                  | 3.3 (1.7, 4.8)                             |

<sup>a</sup> Hypertensive status defined as systolic BP $\geq$ 140 or diastolic BP $\geq$ 90 or on antihypertensive medication

<sup>b</sup> Means are adjusted for age, sex and ethnicity

<sup>c</sup> Difference in mean HbA1c in hypertensive group versus non-hypertensive group expressed as a percentage of mean in the non-hypertensive group
